# Supplementary material for: RanBPM regulates cell shape, arrangement, and capacity of the female germline stem cell niche in Drosophila melanogaster
Source: PubMed Central journal article supplement — J Cell Biol. 2008 Sep 8;182(5):963–77. doi: 10.1083/jcb.200711046 (PMC2528568; doi:10.1083/jcb.200711046), 2008-09-08
Supplement: jcb.200711046_1.pdf [file jcb.200711046_1.pdf]

Table S1. **Reversion analysis of *RanBPM* transposon insertions**

| <b>Transposable element</b> | <b>Insertion phenotype</b> | <b>Excision lines at 25 °C</b> |               |                   |                        |
|-----------------------------|----------------------------|--------------------------------|---------------|-------------------|------------------------|
|                             |                            | <b>Viable fertile</b>          | <b>Lethal</b> | <b>Semilethal</b> | <b>Total excisions</b> |
| <i>P{RSS}5HA-1215</i>       | Semilethal semisterile     | 21                             | 3             | 4                 | 28                     |
| <i>P{RS3}CB-6232-3</i>      | Semilethal semisterile     | 38                             | 15            | 1                 | 54                     |
| <i>Pbac{WH}f06647</i>       | Lethal                     | 5                              | 0             | 0                 | 5                      |
